# Supplementary material for: RNase J participates in a pentatricopeptide repeat protein-mediated 5′ end maturation of chloroplast mRNAs
Source: PubMed Central journal article supplement — Nucleic Acids Res. 2013 Aug 6;41(19):9141–51. doi: 10.1093/nar/gkt640 (PMC3799425; doi:10.1093/nar/gkt640), 2013-08-06
Supplement: supp_gkt640_nar-02424-a-2012-File003.pdf [file supp_gkt640_nar-02424-a-2012-File003.pdf]

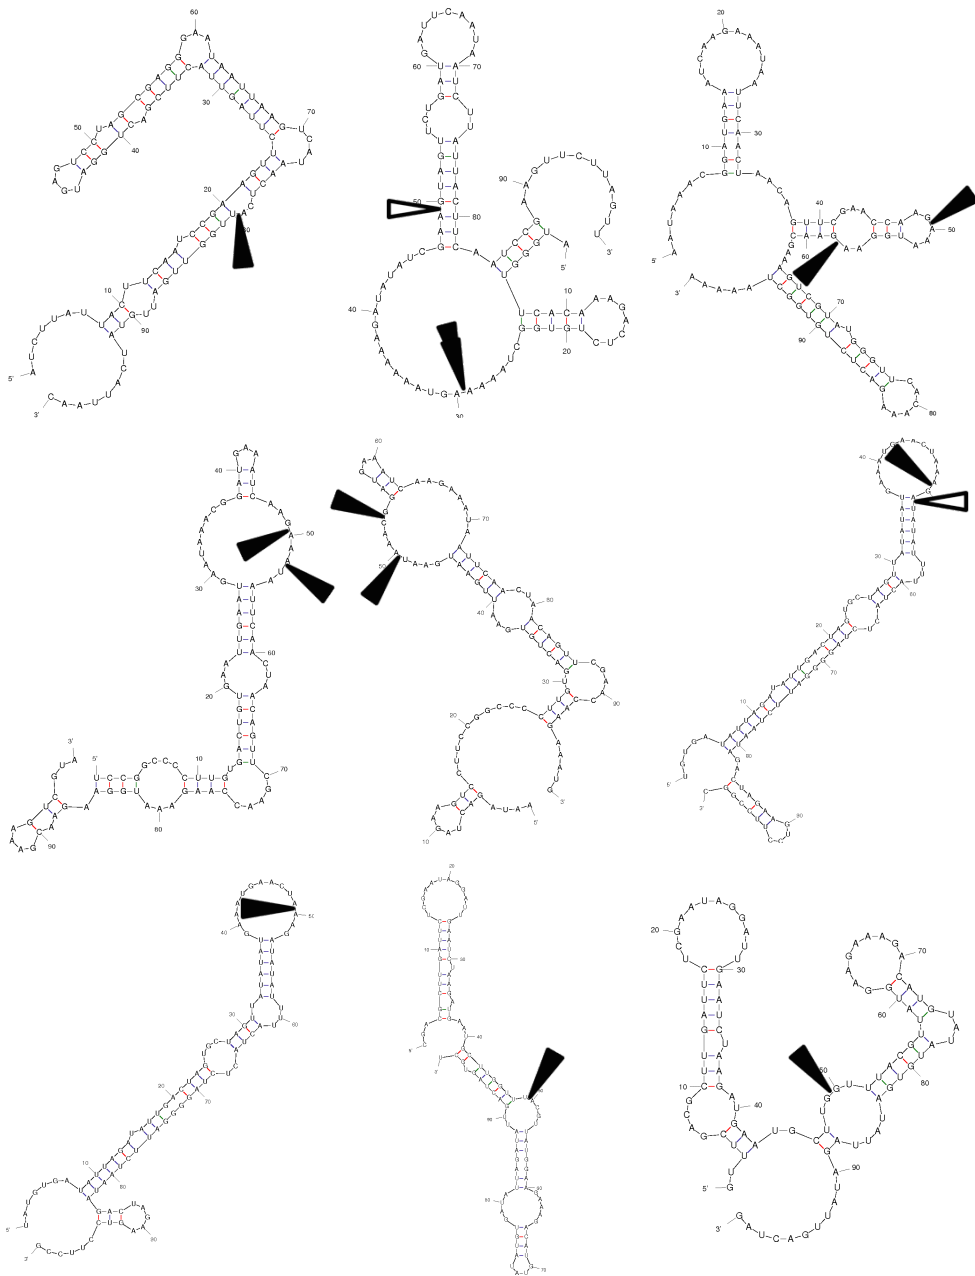

**Supplementary Figure 1.**

The majority of *atpH* 5' ends in RNase J-deficient material map to RNA regions with predicted single-stranded character. Segments of the *atpI-atpH* intergenic sequence flanking (+/- 50 nucleotides) each mapped RNase J-dependent *atpH* 5' extension (Figure 2B) were folded by the mfold web server (<http://mfold.rna.albany.edu/?q=mfold>) with standard parameters at 37°C. Predicted local secondary structures for each *atpH* 5' end are shown. Filled arrowheads indicate termini mapping to unstructured regions (13 out of 15 clones), and open arrowheads designate ends mapping to structured segments.

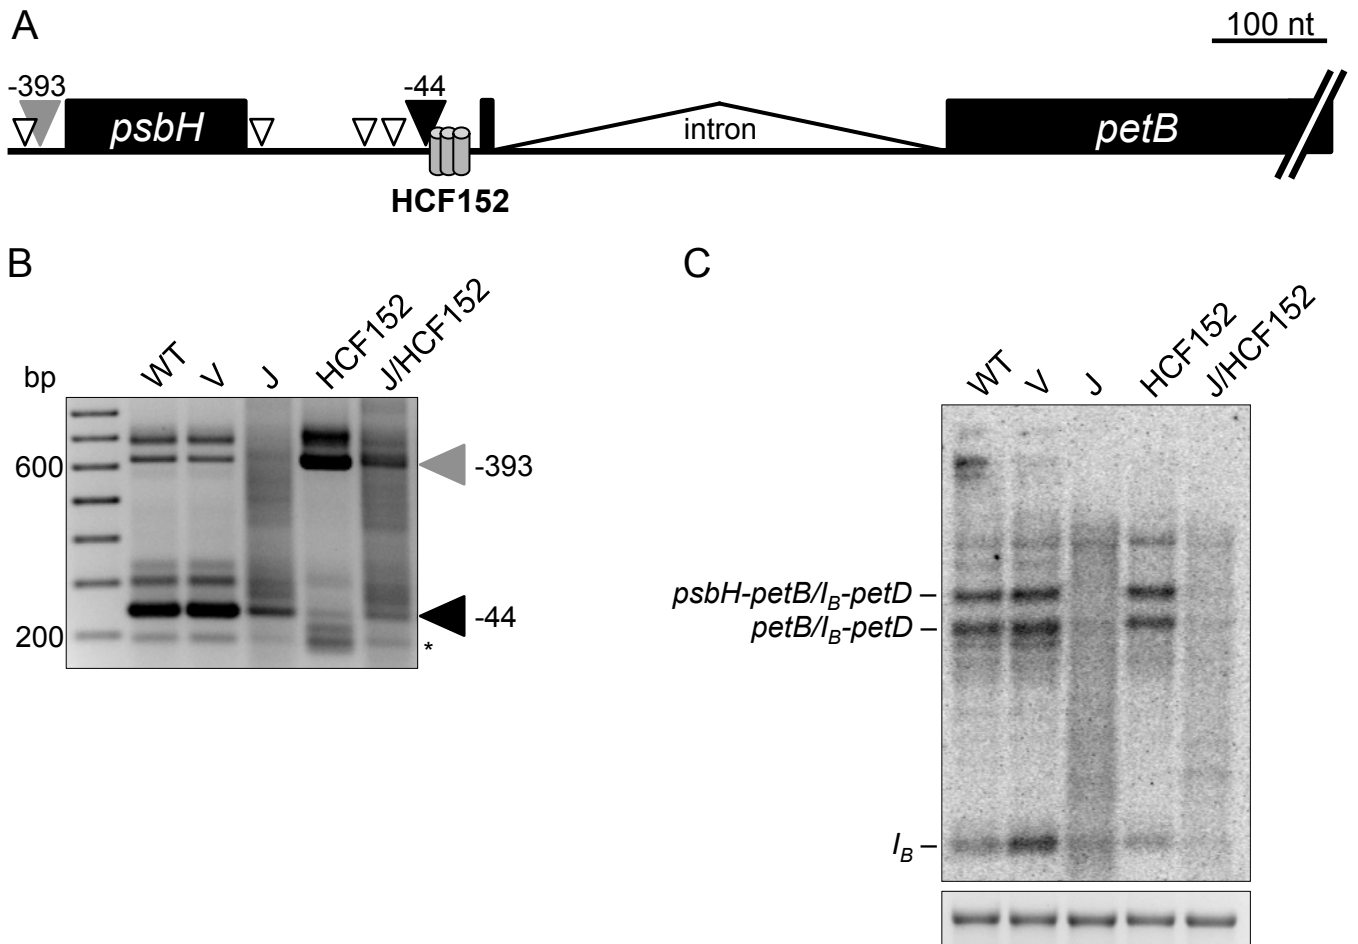

### Supplementary Figure 2.

5' RACE and RNA gel blot analyses of unspliced *petB* transcripts. **(A)** Schematic of the major bands detected by 5' RACE. The filled gray and black arrowheads correspond to the similarly-labeled bands in (B). Open arrowheads represent estimated 5' ends from products of intermediate sizes. HCF152, conserved minimal HCF152 binding site (1). **(B)** Gel separation of 5' RACE products for *petB* intron-containing RNAs. The filled arrowhead designates the processed 5' end of unspliced *petB* (2), the open arrowhead marks an unspliced transcript terminating upstream of *psbH*, and the asterisk indicates the linearized intron. Positions relative to the *petB* translation initiation codon are shown. **(C)** RNA gel blot hybridized with a  $\alpha^{P32}$ -UTP-labeled RNA probe for the intron of *petB*. *I<sub>B</sub>* indicates the *petB* intron. An ethidium bromide-stained image of 28S rRNA is shown below to reflect loading.

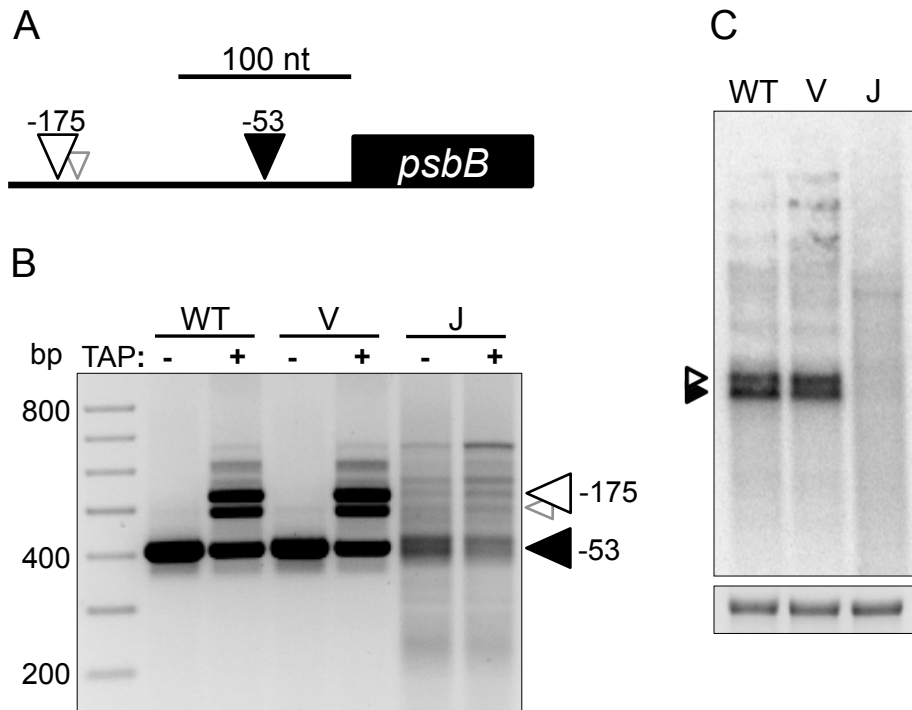

### Supplementary Figure 3.

5' RACE and RNA gel blot analyses of *psbB*. **(A)** Schematic of the major 5' RACE products generated for *psbB*. Arrowheads correspond to the labeled bands described in (B). **(B)** Gel separation of *psbB* 5' RACE products. TAP treatment is designated as in Figure 4. The filled arrowhead marks the processed *psbB* 5' end (3); the open black arrowhead specifies the major PEP-derived primary transcript (3); and the open grey arrowhead indicates a second minor primary transcript (4). Numbers are positions relative to the *psbB* translation initiation codon. **(C)** RNA gel blot hybridized with a  $\alpha^{32P}$ -UTP-labeled RNA probe for *psbB*. Arrowheads indicate the major primary (open) and processed (filled) forms of *psbB*. An ethidium bromide-stained image of 28S rRNA is shown below to reflect loading.

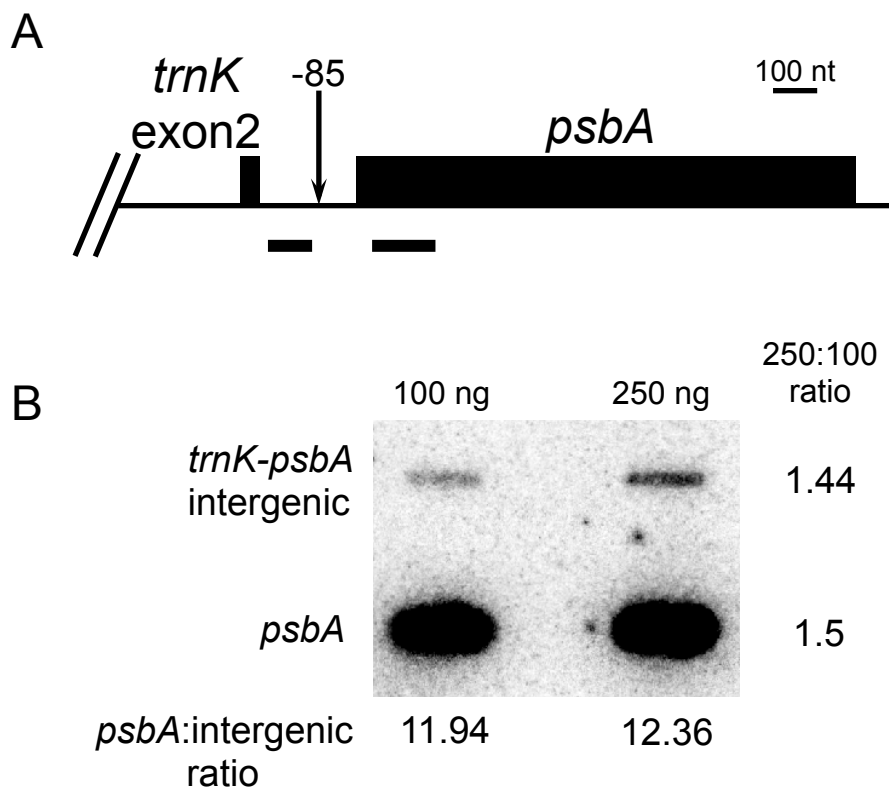

**Supplementary Figure 4.**

Run-on transcription in WT chloroplasts. 100 or 250 ng of PCR products from the regions labeled in red (A) were fixed to nylon membrane. Primers are in Supplementary Table S1. Run-on transcription (B) was conducted as previously described (7). The ratios were calculated after quantification using a Storm scanner (GE Healthcare).

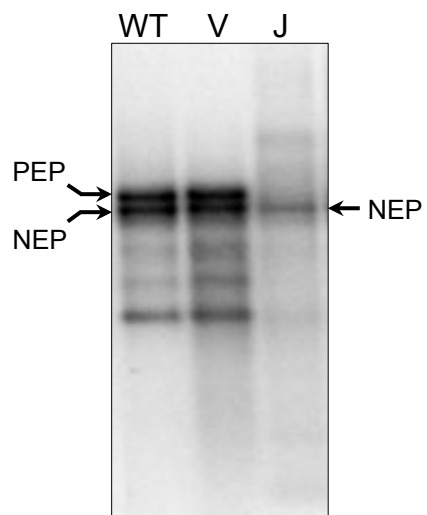

**Supplementary Figure 5.**

DNA-probed RNA gel blot for *atpB*. NEP- and PEP-transcribed *atpB* transcripts are indicated (6).

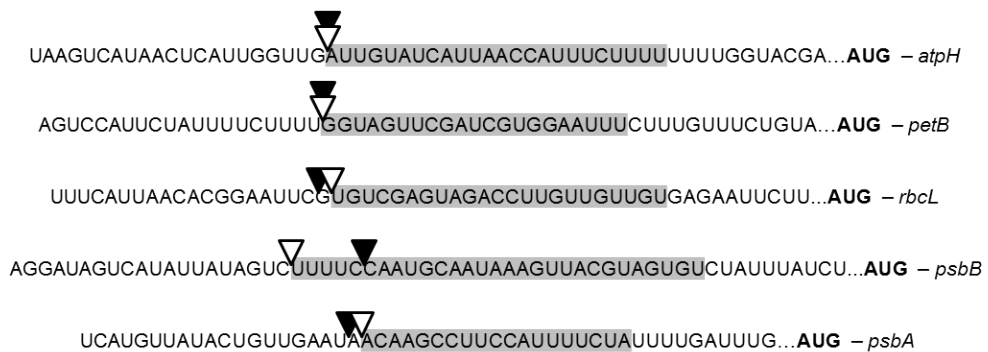

**Supplementary Figure 6.**

Mature mRNA 5' ends in *N. benthamiana* (filled arrowheads) closely resemble the 5' ends of orthologous sRNA (open arrowheads) that serve as markers for PPR or PPR-like protein binding sites (1). Highlighted regions represent alignments to sRNA from *Arabidopsis* (5), or in the case of *psbB* from *H. vulgare* (1).

## Supplementary references

1. Zhelyazkova, P., Hammani, K., Rojas, M., Voelker, R., Vargas-Suarez, M., Borner, T. and Barkan, A. (2012) Protein-mediated protection as the predominant mechanism for defining processed mRNA termini in land plant chloroplasts. *Nucleic Acids Res*, **40**, 3092-3105.
2. Westhoff, P. and Herrmann, R.G. (1988) Complex RNA maturation in chloroplasts: the *psbB* operon from spinach. *Eur. J. Biochem.*, **171**, 551-564.
3. Tanaka, M., Obokata, J., Chunwongse, J., Shinozaki, K. and Sugiura, M. (1987) Rapid splicing and stepwise processing of a transcript from the *psbB* operon in tobacco chloroplasts: determination of the intron sites in *petB* and *petD*. *Mol Gen Genet.*, **209**, 427-431.
4. Zhelyazkova, P., Sharma, C.M., Forstner, K.U., Liere, K., Vogel, J. and Borner, T. (2012) The primary transcriptome of barley chloroplasts: numerous noncoding RNAs and the dominating role of the plastid-encoded RNA polymerase. *Plant Cell*, **24**, 123-136.
5. Ruwe, H. and Schmitz-Linneweber, C. (2012) Short non-coding RNA fragments accumulating in chloroplasts: footprints of RNA binding proteins? *Nucleic Acids Res*, **40**, 3106-3116.
6. Schweer, J., Loschelder, H. and Link, G. (2006) A promoter switch that can rescue a plant sigma factor mutant. *FEBS Lett.*, **580**, 6617-6622.
7. Hotto, A.M., Huston, Z.E. and Stern, D.B. (2010) Overexpression of a natural chloroplast-encoded antisense RNA in tobacco destabilizes 5S rRNA and retards plant growth. *BMC Plant Biol.*, **10**, 213.

**Supplementary Table 1. Primer sequences for VIGS target amplification, 5' RACE analysis, and RNA gel blot probe synthesis.**

| <b>Primer name</b>         | <b>Sequence (5'-3')</b>                        |
|----------------------------|------------------------------------------------|
| PPR10(1) – for             | TAGGATCCGCTGTGGTTTTGAGCCTGAT                   |
| PPR10(1) – rev             | GTTCCCTCCCTTGGAAATAGC                          |
| PPR10(2) – for             | TAGGATCCTCATGGGTATGGAGAGAGCA                   |
| PPR10(2) – rev             | ATTCTTACGGCCTCCTCCAT                           |
| HCF152 – for               | TAGGATCCGATGCGAGCGAGAGGTATTG                   |
| HCF152 – rev               | GGCTTCCTAGCCAAAGCAAT                           |
| MRL1(1) – for              | TAGGATCCTATGATTCCCGTGCCTTTTC                   |
| MRL1(1) – rev              | CTTGATAAGGCAAGCCAAGC                           |
| MRL1(2) – for              | TAGGATCCACTGGACTGAAACCCGATTG                   |
| MRL1(2) – rev              | ATTGGTCGTGCTTCTGCTTT                           |
| RNJ(1) – for               | ACGAATGGCACTATGGGAAG                           |
| RNJ(1) – rev               | GGGCCGTCGCCTCCAAATC                            |
| RNJ(2) – for               | GATTTGGAGGCGACGGCCC                            |
| RNJ(2) – rev               | CTTGGAACCTGCTGTGGAGT                           |
| atpH sense – for           | TTGTAATACGACTCACTATAGGGTCGCAAATAAAAAGTGCTAATGC |
| atpH sense – rev           | TTCCGTTATTGCTGCTGGAT                           |
| petB.exon sense – for      | CCGTTACTGAGGCTTTTGCT                           |
| petB.exon sense – rev      | TTGTAATACGACTCACTATAGGGGGCAGTAAGAAGCGGCAATA    |
| rbcL sense – for           | TTGTAATACGACTCACTATAGGGATGTCACCACAAACAGAGAC    |
| rbcL sense – rev           | TTACTTATCCAAAACGTCCACTG                        |
| psbA sense – for           | TTGTAATACGACTCACTATAGGGGGTTGAAAGCCATAGTGCTGA   |
| psbA sense – rev           | GTATGCGACCTTGGATTGCT                           |
| petB.intron sense – for    | TGATAGAGATGGTTCTACTTTCGTC                      |
| petB.intron sense – rev    | TTGTAATACGACTCACTATAGGGTCTCTGGAAAATCCGAAAGC    |
| psbB sense – for           | GCTTTGGTTTTGGTGCATT                            |
| psbB sense – rev           | TTGTAATACGACTCACTATAGGGTATTCCATCCCCGTTATCCA    |
| atpB – for                 | TATTTGGCGGAGTGGGTGAACGTA                       |
| atpB – rev                 | AGTTCATAGCCTTCGCGGTAGCTT                       |
| 5'RACE adapter oligo (RNA) | AUAUGCGCGAAUUCUGUAGAACGAACACUAGAAGAAA          |
| 5'RACE oligo primer        | AATTCCTGTACGAACACTAG                           |
| atpH – 5'RACE GSP          | GTGCTAATGCTACAACCAAGTCC                        |
| petB.exon – 5'RACE GSP     | ACGTGGGGAGGAACGTATTT                           |
| rbcL – 5'RACE GSP          | TCCTTGGTTTTGGTACTCAGGA                         |
| psbA – 5'RACE GSP          | AACCATTCAACGGATGC                              |
| petB.intron – 5'RACE GSP   | CCGGACACGAGGTCTGAATA                           |
| psbB – 5'RACE GSP          | GCCAAAAAGCATAAGCCAGA                           |
| qPCR atpH-5'               | CTCGCGATACCCTCTACAGC                           |
| qPCR atpH-3'               | ATTTCTGCCGCTTCCGTTAT                           |
| qPCR petB-5'               | GTATCTCACCGGCGGATTTA                           |
| qPCR petB-3'               | CACTGCCCAATAACCGACTT                           |
| trnK-psbA inter-run-on-5'  | CATGACTTATATACTCGTGTCAACCA                     |
| trnK-psbA inter-run-on-3'  | TTCTAATTTTCTGTAGAGAAGTCCGTA                    |
| psbA-run-on-5'             | TGTCTACTGGAGGAGCAGCA                           |
| psbA-run-on-3'             | TGTCTACTGGAGGAGCAGCA                           |
